# Supplementary material for: Design of anaerobic membrane bioreactors for the valorization of dilute organic carbon waste streams
Source: Royal Society of Chemistry journal article supplement (doi:10.1039/c5ee03715h), 2016-01-01
Supplement: c5ee03715h1.pdf [file c5ee03715h1.pdf]

## †Electronic Supplementary Information (ESI)

# Design of Anaerobic Membrane Bioreactors for the Valorization of Dilute Organic Carbon Waste Streams

Brian D. Shoener<sup>1</sup>, Cheng Zhong<sup>1</sup>, Anthony D. Greiner<sup>2</sup>, Wendell Khunjar<sup>2</sup>,  
Pei-Ying Hong<sup>3</sup>, Jeremy S. Guest<sup>1,\*</sup>

<sup>1</sup> University of Illinois at Urbana-Champaign, Department of Civil & Environmental Engineering, 205 N. Mathews Avenue, Urbana, Illinois 61801, USA.

<sup>2</sup> Hazen and Sawyer, 4035 Ridge Top Road, Suite 400, Fairfax VA 22030, USA.

<sup>3</sup> Water Desalination and Reuse Center, Division of Biological and Environmental Science and Engineering, 4700 King Abdullah University of Science and Technology, Thuwal 23955-6900, Saudi Arabia.

### List of Tables

**Table ESI-1.** List of all 150 AnMBR configurations examined in this manuscript.

**Table ESI-2.** Key static cost and efficiency assumptions for all designs.

**Table ESI-3.** Materials and processes in the life cycle inventory (LCI).

**Table ESI-4.** Maximum and minimum values for the TEA and LCA metrics examined in Figure 3.

**Table ESI-5.** Heat transfer coefficients (median of range) and temperatures used to calculate digester heating requirements.

**Table ESI-6.** Values used to generate Figure 6 and corresponding citations.

### List of Figures

**Figure ESI-1.** System boundary for LCA/TEA of AnMBRs, including both construction and operation.

**Figure ESI-2.** Side view of membrane tank and pumphouse for submerged AnMBRs.

**Figure ESI-3.** Detailed side view of membrane tank and pumphouse for submerged AnMBRs.

**Figure ESI-4.** Detailed plan view of membrane tank and pumphouse for submerged AnMBR configuration.

**Figure ESI-5.** Side view of a single membrane train.

**Figure ESI-6.** Side view of membrane trains in series.

## List of Abbreviations

|                               |                                         |
|-------------------------------|-----------------------------------------|
| AeF                           | Aerobic polishing filter                |
| AF                            | Anaerobic filter                        |
| AFMBR                         | Anaerobic fluidized membrane bioreactor |
| AnMBR                         | Anaerobic membrane bioreactor           |
| BOD                           | Biochemical oxygen demand               |
| CAS                           | Conventional activated sludge           |
| CH <sub>4</sub>               | Methane                                 |
| CHP                           | Combined heat and power                 |
| CIP                           | Cleaning in-place                       |
| CO <sub>2</sub>               | Carbon dioxide                          |
| COD                           | Chemical oxygen demand                  |
| COP                           | Cleaning out-of-place                   |
| CSTR                          | Continuously stirred tank reactor       |
| DM                            | Degassing membrane                      |
| FS                            | Flat sheet                              |
| GAC                           | Granular activated carbon               |
| GHG                           | Greenhouse gas                          |
| GWP                           | Global warming potential                |
| HF                            | Hollow fiber                            |
| HH                            | Human health                            |
| HRT                           | Hydraulic retention time                |
| LCA                           | Life cycle assessment                   |
| LCI                           | Life cycle inventory                    |
| LCIA                          | Life cycle impact assessment            |
| LHS                           | Latin hypercube sampling                |
| MGD                           | Million gallons·day <sup>-1</sup>       |
| MT                            | Multi-tube                              |
| N                             | Nitrogen                                |
| NaOCl                         | Sodium hypochlorite                     |
| NH <sub>3</sub>               | Ammonia                                 |
| NH <sub>4</sub> <sup>+</sup>  | Ammonium                                |
| NPV                           | Net present value                       |
| OLR                           | Organic loading rate                    |
| P                             | Phosphorus                              |
| PES                           | Polyethersulfone                        |
| PET                           | Polyethylene terephthalate              |
| PO <sub>4</sub> <sup>3-</sup> | Phosphate                               |
| PTFE                          | Polytetrafluoroethylene                 |
| PVDF                          | Polyvinylidene fluoride                 |
| QSD                           | Quantitative sustainable design         |
| RD&D                          | Research, development, and deployment   |
| SGD                           | Specific gas demand                     |
| SRT                           | Solids residence time                   |
| t <sub>bw</sub>               | Backwashing duration                    |
| TEA                           | Techno-economic analysis                |
| TMP                           | Transmembrane pressure                  |
| WRRF                          | Water resource recovery facility        |
| WTP                           | Wastewater treatment plant              |

# 1. Configurations Evaluated

**Table ESI-1.** List of all 150 AnMBR configurations examined in this manuscript.

|                                             |                                          |
|---------------------------------------------|------------------------------------------|
| CSTR none Submerged HF PET DM               | AF none Cross-flow FS PET no DM          |
| CSTR none Submerged HF PET no DM            | AF none Cross-flow FS PTFE DM            |
| CSTR none Submerged HF PTFE DM              | AF none Cross-flow FS PTFE no DM         |
| CSTR none Submerged HF PTFE no DM           | AF none Cross-flow FS sinter steel DM    |
| CSTR none Submerged HF PES DM               | AF none Cross-flow FS sinter steel no DM |
| CSTR none Submerged HF PES no DM            | AF none Cross-flow FS PES DM             |
| CSTR none Submerged HF PVDF DM              | AF none Cross-flow FS PES no DM          |
| CSTR none Submerged HF PVDF no DM           | AF none Cross-flow FS PVDF DM            |
| CSTR none Submerged FS PET DM               | AF none Cross-flow FS PVDF no DM         |
| CSTR none Submerged FS PET no DM            | AF none Cross-flow MT PET DM             |
| CSTR none Submerged FS PTFE DM              | AF none Cross-flow MT PET no DM          |
| CSTR none Submerged FS PTFE no DM           | AF none Cross-flow MT PTFE DM            |
| CSTR none Submerged FS sinter steel DM      | AF none Cross-flow MT PTFE no DM         |
| CSTR none Submerged FS sinter steel no DM   | AF none Cross-flow MT ceramic DM         |
| CSTR none Submerged FS PES DM               | AF none Cross-flow MT ceramic no DM      |
| CSTR none Submerged FS PES no DM            | AF none Cross-flow MT PES DM             |
| CSTR none Submerged FS PVDF DM              | AF none Cross-flow MT PES no DM          |
| CSTR none Submerged FS PVDF no DM           | AF none Cross-flow MT PVDF DM            |
| CSTR none Cross-flow FS PET DM              | AF none Cross-flow MT PVDF no DM         |
| CSTR none Cross-flow FS PET no DM           | AF GAC Submerged HF PET DM               |
| CSTR none Cross-flow FS PTFE DM             | AF GAC Submerged HF PET no DM            |
| CSTR none Cross-flow FS PTFE no DM          | AF GAC Submerged HF PTFE DM              |
| CSTR none Cross-flow FS sinter steel DM     | AF GAC Submerged HF PTFE no DM           |
| CSTR none Cross-flow FS sinter steel no DM  | AF GAC Submerged HF PES DM               |
| CSTR none Cross-flow FS PES DM              | AF GAC Submerged HF PES no DM            |
| CSTR none Cross-flow FS PES no DM           | AF GAC Submerged HF PVDF DM              |
| CSTR none Cross-flow FS PVDF DM             | AF GAC Submerged HF PVDF no DM           |
| CSTR none Cross-flow FS PVDF no DM          | AF GAC Submerged FS PET DM               |
| CSTR none Cross-flow MT <sup>i</sup> PET DM | AF GAC Submerged FS PET no DM            |
| CSTR none Cross-flow MT PET no DM           | AF GAC Submerged FS PTFE DM              |
| CSTR none Cross-flow MT PTFE DM             | AF GAC Submerged FS PTFE no DM           |
| CSTR none Cross-flow MT PTFE no DM          | AF GAC Submerged FS sinter steel DM      |
| CSTR none Cross-flow MT ceramic DM          | AF GAC Submerged FS sinter steel no DM   |
| CSTR none Cross-flow MT ceramic no DM       | AF GAC Submerged FS PES DM               |
| CSTR none Cross-flow MT PES DM              | AF GAC Submerged FS PES no DM            |
| CSTR none Cross-flow MT PES no DM           | AF GAC Submerged FS PVDF DM              |
| CSTR none Cross-flow MT PVDF DM             | AF GAC Submerged FS PVDF no DM           |
| CSTR none Cross-flow MT PVDF no DM          | AF AeF Submerged HF PET DM               |
| CSTR GAC Submerged HF PET DM                | AF AeF Submerged HF PET no DM            |
| CSTR GAC Submerged HF PET no DM             | AF AeF Submerged HF PTFE DM              |
| CSTR GAC Submerged HF PTFE DM               | AF AeF Submerged HF PTFE no DM           |
| CSTR GAC Submerged HF PTFE no DM            | AF AeF Submerged HF PES DM               |
| CSTR GAC Submerged HF PES DM                | AF AeF Submerged HF PES no DM            |
| CSTR GAC Submerged HF PES no DM             | AF AeF Submerged HF PVDF DM              |
| CSTR GAC Submerged HF PVDF DM               | AF AeF Submerged HF PVDF no DM           |

---

|                                          |                                         |
|------------------------------------------|-----------------------------------------|
| CSTR GAC Submerged HF PVDF no DM         | AF AeF Submerged FS PET DM              |
| CSTR GAC Submerged FS PET DM             | AF AeF Submerged FS PET no DM           |
| CSTR GAC Submerged FS PET no DM          | AF AeF Submerged FS PTFE DM             |
| CSTR GAC Submerged FS PTFE DM            | AF AeF Submerged FS PTFE no DM          |
| CSTR GAC Submerged FS PTFE no DM         | AF AeF Submerged FS sinter steel DM     |
| CSTR GAC Submerged FS sinter steel DM    | AF AeF Submerged FS sinter steel no DM  |
| CSTR GAC Submerged FS sinter steel no DM | AF AeF Submerged FS PES DM              |
| CSTR GAC Submerged FS PES DM             | AF AeF Submerged FS PES no DM           |
| CSTR GAC Submerged FS PES no DM          | AF AeF Submerged FS PVDF DM             |
| CSTR GAC Submerged FS PVDF DM            | AF AeF Submerged FS PVDF no DM          |
| CSTR GAC Submerged FS PVDF no DM         | AF AeF Cross-flow FS PET DM             |
| AF none Submerged HF PET DM              | AF AeF Cross-flow FS PET no DM          |
| AF none Submerged HF PET no DM           | AF AeF Cross-flow FS PTFE DM            |
| AF none Submerged HF PTFE DM             | AF AeF Cross-flow FS PTFE no DM         |
| AF none Submerged HF PTFE no DM          | AF AeF Cross-flow FS sinter steel DM    |
| AF none Submerged HF PES DM              | AF AeF Cross-flow FS sinter steel no DM |
| AF none Submerged HF PES no DM           | AF AeF Cross-flow FS PES DM             |
| AF none Submerged HF PVDF DM             | AF AeF Cross-flow FS PES no DM          |
| AF none Submerged HF PVDF no DM          | AF AeF Cross-flow FS PVDF DM            |
| AF none Submerged FS PET DM              | AF AeF Cross-flow FS PVDF no DM         |
| AF none Submerged FS PET no DM           | AF AeF Cross-flow MT PET DM             |
| AF none Submerged FS PTFE DM             | AF AeF Cross-flow MT PET no DM          |
| AF none Submerged FS PTFE no DM          | AF AeF Cross-flow MT PTFE DM            |
| AF none Submerged FS sinter steel DM     | AF AeF Cross-flow MT PTFE no DM         |
| AF none Submerged FS sinter steel no DM  | AF AeF Cross-flow MT ceramic DM         |
| AF none Submerged FS PES DM              | AF AeF Cross-flow MT ceramic no DM      |
| AF none Submerged FS PES no DM           | AF AeF Cross-flow MT PES DM             |
| AF none Submerged FS PVDF DM             | AF AeF Cross-flow MT PES no DM          |
| AF none Submerged FS PVDF no DM          | AF AeF Cross-flow MT PVDF DM            |
| AF none Cross-flow FS PET DM             | AF AeF Cross-flow MT PVDF no DM         |

---

## 2. Supporting Information for LCA and TEA

**Table ESI-2.** Key static cost and efficiency assumptions for all designs. All other costs were determined using Capdet.<sup>1</sup>

| Parameter                                   | Value                                                       | Citation |
|---------------------------------------------|-------------------------------------------------------------|----------|
| Unit Cost of GAC                            | \$13.78·kg <sup>-1</sup>                                    | 2        |
| Unit Cost of Electricity                    | \$0.10·kWh <sup>-1</sup>                                    | 3        |
| Unit Cost of EF-120 Degassing Membrane (DM) | \$10,000·DM <sup>-1</sup>                                   | 4        |
| Flow Rate through DM                        | 30 m <sup>3</sup> ·hr <sup>-1</sup>                         | 5        |
| Power Consumption by DM                     | 3 kW·DM <sup>-1</sup>                                       | a        |
| Unit Cost of Sodium Hypochlorite (NaOCl)    | \$0.14·L <sup>-1</sup>                                      | 6        |
| NaOCl Usage Rate (12.5% solution)           | 2.2 L·yr <sup>-1</sup> per m <sup>3</sup> ·d <sup>-1</sup>  | 6        |
| Unit Cost of Citric Acid                    | \$0.22·L <sup>-1</sup>                                      | 6        |
| Citric Acid Usage Rate (100% solution)      | 0.6 L·yr <sup>-1</sup> per m <sup>3</sup> ·d <sup>-1</sup>  | 6        |
| Unit Cost of Bisulfite                      | \$0.08·L <sup>-1</sup>                                      | 6        |
| Bisulfite Usage Rate (38% solution)         | 0.35 L·yr <sup>-1</sup> per m <sup>3</sup> ·d <sup>-1</sup> | 6        |
| Unit Cost of Wall Concrete                  | \$850·m <sup>-3</sup>                                       | 2        |
| Unit Cost of Slab Concrete                  | \$460·m <sup>-3</sup>                                       | 2        |
| Unit Cost of Earthwork                      | \$10.50·m <sup>-3</sup>                                     | 2        |
| Unit Cost of Packing Media                  | \$195·m <sup>-3</sup>                                       | 2        |
| Sludge Disposal Cost                        | \$0.14·kg <sup>-1</sup>                                     | 6        |
| Membrane Replacement Labor Cost             | 15% of membrane cost                                        | 6        |
| CHP Construction Cost                       | \$1,225·kW generated                                        | 2        |
| Fuel Cell CHP Efficiency                    | 40.5%                                                       | 7        |
| Microturbine CHP Efficiency                 | 27%                                                         | 8        |
| Internal Combustion CHP Efficiency          | 36%                                                         | 7        |
| Combustion Gas CHP Efficiency               | 31.5%                                                       | 7        |

<sup>a</sup> DMs were assumed to operate at energy neutrality such that electricity consumption by DMs was equivalent to electricity production from methane recovered by the DMs.

### Determination of Blower Cost

Specific gas demand (SGD) per unit membrane area was assumed and was multiplied by membrane surface area to determine SGD per unit. This was then multiplied by the number of units to determine total SGD. The number of blowers needed for a given design was determined by comparing the required air flow to the capacity of an individual blower (three different sized blowers were used: 7,500, 18,000, and 100,000 scfm). Starting with the smallest blower under the required air flow, number of blowers ( $N$ ) was increased until the SGD was met.

| Design capacity for blower system (TCFM) [scfm] | Capacity of individual blower (CFMB) [scfm]                     | Purchase cost of standard blower [\$]                             | Blower size [scfm] |
|-------------------------------------------------|-----------------------------------------------------------------|-------------------------------------------------------------------|--------------------|
| 0–30,000                                        | $CFMB = \frac{TCFM}{N^a}$ $\frac{TCFM}{N} < 7,500 \text{ scfm}$ | $58,000 \cdot 0.7 \cdot CFMB^{0.6169}$ <b>(Equation ESI-1)</b>    | 3,000              |
| 30,000–72,000                                   | $CFMB = \frac{TCFM}{N}$ $\frac{TCFM}{N} < 18,000 \text{ scfm}$  | $218,000 \cdot 0.377 \cdot CFMB^{0.5928}$ <b>(Equation ESI-2)</b> | 12,000             |
| >72,000                                         | $CFMB = \frac{TCFM}{N}$ $\frac{TCFM}{N} < 100,000 \text{ scfm}$ | $480,000 \cdot 0.964 \cdot CFMB^{0.4286}$ <b>(Equation ESI-3)</b> | 50,000             |

### Determination of Pumping Cost

Pumping cost was determined according to the following equation:

$$Pump \text{ Cost} = 2.065 \cdot 10^5 + 7.721 \cdot 10^4 \cdot Q_{avg} \quad \text{(Equation ESI-4)}$$

where  $Q_{avg}$  is the average influent flow rate (MGD).

**Table ESI-3.** Materials and processes in the life cycle inventory (LCI).

| <b>Material or Process</b>            | <b>LCI Data Source</b>                                                                                 |
|---------------------------------------|--------------------------------------------------------------------------------------------------------|
| Aluminum                              | Aluminum ingot, production mix, at plant/US                                                            |
| Bitumen                               | Bitumen, at refinery/kg/US                                                                             |
| Ceramic*                              | Alumina, at plant/US                                                                                   |
| CHP                                   | Mini CHP plant, common components for heat+electricity {CH}  construction   Alloc Def, U               |
| Chromium Steel                        | Steel, chromium steel 18/8, hot rolled {RER}  production   Alloc Def, U                                |
| Citric Acid                           | Citric acid {RER}  production   Alloc Def, U                                                           |
| Concrete                              | Concrete, normal {CH}  production   Alloc Def, U                                                       |
| Copper                                | Copper {RER}  production, primary   Alloc Def, U                                                       |
| Copper                                | Copper concentrate {RER}  copper mine operation   Alloc Def, U                                         |
| Disposal                              | Inert waste, for final disposal {CH}  treatment of inert waste, inert material landfill   Alloc Rec, U |
| Electricity, coal                     | Electricity, anthracite coal, at power plant/RNA                                                       |
| Electricity, hydro                    | Electricity, high voltage {ASCC}  electricity production, hydro, pumped storage   Alloc Def, U         |
| Electricity, natural gas              | Electricity, natural gas, at power plant/US                                                            |
| Electricity, nuclear                  | Electricity, nuclear, at power plant/US                                                                |
| Electricity, oil                      | Electricity, high voltage {GB}  electricity production, oil   Alloc Def, U                             |
| Electricity, solid waste incineration | Electricity, high voltage {CH}  treatment of municipal solid waste, incineration   Alloc Def, U        |
| Electricity, wind                     | Electricity, high voltage {ASCC}  electricity production, wind, <1MW turbine, onshore   Alloc Def, U   |
| Excavation                            | Excavation, hydraulic digger {RER}  processing   Alloc Def, U                                          |
| Extrusion of plastic pipes            | Extrusion, plastic pipes {RER}  production   Alloc Def, U                                              |
| Flat glass                            | Flat glass, uncoated {RER}  production   Alloc Def, U                                                  |
| GAC*                                  | Carbon black {GLO}  production   Alloc Def, U                                                          |
| HDPE                                  | Polyethylene, high density, granulate {RER}  production   Alloc Def, U                                 |
| Inorganic chemicals                   | Chemical, inorganic {GLO}  production   Alloc Def, U                                                   |
| LDPE                                  | Polyethylene, low density, granulate {RER}  production   Alloc Def, U                                  |
| Limestone                             | Lime {CH}  production, milled, loose   Alloc Def, U                                                    |
| Limestone                             | Limestone, crushed, for mill {CH}  production   Alloc Def, U                                           |
| Limestone                             | Limestone, unprocessed {CH}  limestone quarry operation   Alloc Def, U                                 |
| Organic chemicals                     | Chemical, organic {GLO}  production   Alloc Def, U                                                     |
| PES*                                  | Polysulfone {GLO}  polysulfone production, for membrane filtration production   Alloc Def, U           |
| PET                                   | Polyethylene terephthalate, granulate, amorphous {RER}  production   Alloc Def, U                      |
| PTFE*                                 | Tetrafluoroethylene {RER}  production   Alloc Def, U                                                   |
| PVDF*                                 | Polyvinylfluoride, film {US}  production   Alloc Def, U                                                |
| Reinforcing steel                     | Reinforcing steel {RER}  production   Alloc Def, U                                                     |
| Rock wool                             | Rock wool {CH}  production   Alloc Def, U                                                              |
| Rock wool                             | Rock wool, packed {CH}  production   Alloc Def, U                                                      |
| Sintered steel*                       | Sinter, iron {GLO}  production   Alloc Def, U                                                          |

|                             |                                                                                                                                              |
|-----------------------------|----------------------------------------------------------------------------------------------------------------------------------------------|
| Sodium hypochlorite         | Sodium hypochlorite, without water, in 15% solution state {RER} sodium hypochlorite production, product in 15% solution state   Alloc Def, U |
| Synthetic rubber            | Synthetic rubber {RER} production   Alloc Def, U                                                                                             |
| Tap water                   | Tap water, at user {CH} tap water production and supply   Alloc Def, U                                                                       |
| Transport via freight train | Transport, freight train {US} diesel   Alloc Def, U                                                                                          |
| Transport via truck         | Transport, freight, lorry 16-32 metric ton, EURO5 {RER} transport, freight, lorry 16-32 metric ton, EURO5   Alloc Def, U                     |

An “\*” indicates a material or process for which inventory data were not directly available and a surrogate was used. Direct emissions of nitrogen (as ammonium) and phosphorus (as phosphate) were also included in the life cycle inventory.

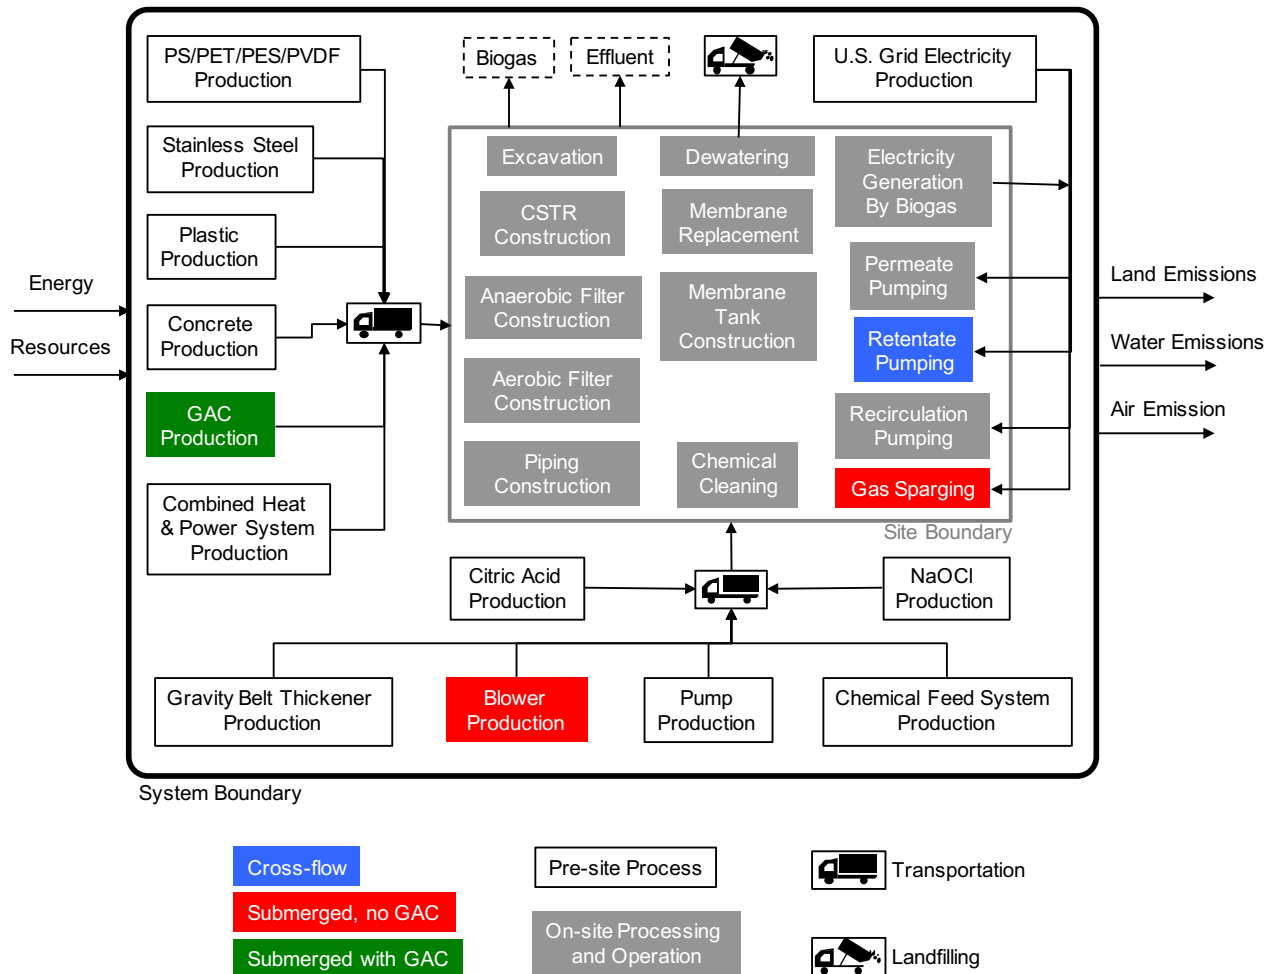

**Figure ESI-1.** System boundary for LCA/TEA of AnMBRs, including both construction and operation. First- and second-order environmental impacts are considered. Impacts pertaining to specific designs are indicated.



**Table ESI-4.** Maximum and minimum values for the TEA, net energy consumption, and LCA metrics examined in Figure 3. All values are in equivalents per m<sup>3</sup> of wastewater treated and are medians (from 3,000 simulations) from each design. Once the median value for each design was determined for each metric, the minimum and maximum values across all designs were identified.

|                                      | <b>Minimum</b><br>[value of “0” in Figure 3] | <b>Maximum</b><br>[value of “1” in Figure 3] |
|--------------------------------------|----------------------------------------------|----------------------------------------------|
| Cost [\$]                            | \$0.07                                       | \$0.17                                       |
| Net Energy Consumption [kWh]         | -0.09                                        | 1.57                                         |
| Ozone Depletion [kg CFC-11]          | 3.60E-09                                     | 7.93E-05                                     |
| Global Warming [kg CO <sub>2</sub> ] | 5.60E-02                                     | 3.97E+00                                     |
| Smog [kg O <sub>3</sub> ]            | -7.92E-04                                    | 6.22E-02                                     |
| Acidification [kg SO <sub>2</sub> ]  | -1.42E-03                                    | 2.88E-02                                     |
| Eutrophication [kg N]                | 2.82E-02                                     | 2.90E-02                                     |
| HH Cancer [kg CTUh]                  | 1.55E-09                                     | 2.42E-08                                     |
| HH Non-Cancer [kg CTUh]              | 1.71E-09                                     | 1.24E-07                                     |
| HH Criteria [kg PM 2.5]              | -2.24E-05                                    | 9.37E-04                                     |
| Ecotoxicity [kg CTUe]                | 1.68E-01                                     | 2.40E+00                                     |

### 3. Determination of Energy Consumption

#### Determination of Pumping Electricity Consumption

The procedure for estimating pumping electricity demand followed the same process as described previously.<sup>9</sup>

The total dynamic head (TDH) is comprised of the static head ( $H_{ts}$ ), the friction head ( $H_{sf}$ ,  $H_{df}$ ), and minor losses ( $H_m$ ). For AnMBRs, permeate pumping must also be considered by including transmembrane pressure (TMP). TDH can then be calculated by the equation below:

$$TDH = H_{ts} + H_{sf} + H_{df} + H_m (+TMP) \quad \text{(Equation ESI-5)}$$

However, because minor losses are insignificant compared to the static and friction heads,  $H_m$  can be negated. Terms in the TDH equation are further elaborated below:

Total Static Head,  $H_{ts}$  (ft): The total static head of pumping can be calculated by the equation below.

$$H_{ts} = H_{ds} - H_{ss} \quad \text{(Equation ESI-6)}$$

Suction Static Head,  $H_{ss}$  (ft): Suction static head of pumping is the elevation difference between the water level in the reactor and the centerline of the permeate pump.

Discharge Static Head,  $H_{ds}$  (ft): Discharge static head of pumping is the elevation difference between the centerline of the pump and the centerline of the effluent (where water is discharged). The effluent is assumed to be the highest point, thus setting the hydraulic reference.

Suction Friction Head,  $H_{sf}$  (ft): Suction friction head can be estimated using the Hazen-Williams equation. Suction friction head refers to the friction loss caused in the pipes on the suction side.

$$H_{sf} = 3.02LV^{1.85}C^{-1.85}D^{-1.17} \quad \text{(Equation ESI-7)}$$

where  $L$  is the length of the pipe (ft),  $V$  is the velocity of the liquid in the pipe ( $\text{ft}\cdot\text{s}^{-1}$ ),  $D$  is the inner diameter of the pipe (ft) and  $C$  is the Hazen-Williams coefficient (110).

Discharge Friction Head,  $H_{df}$  (ft): Discharge friction head refers to the friction loss caused in the pipes on the discharge side. The Hazen-Williams equation is also used to calculate this value.

Transmembrane Pressure,  $TMP$  (ft): This value (defined in Table 2 of the manuscript) is based on the literature, as described in Figure 6 and Table ESI-6.

Brake Horsepower,  $BHP$ : BHP is the amount of horsepower required to drive the pump and can be calculated by the equation below:

$$BHP = \frac{Q \cdot TDH}{3960 \cdot \text{Pump Efficiency}} \quad \text{(Equation ESI-8)}$$

where  $Q$  is the flow rate (gpm),  $TDH$  is the total dynamic head (ft), and the pump efficiency is assumed to be 80%.

Energy consumption,  $E$  (kW): The amount of energy input into the motor of the pump can be calculated as:

$$E = \frac{0.746 \cdot BHP}{\text{Motor Efficiency}} \quad \text{(Equation ESI-9)}$$

where  $BHP$  is the break horsepower (hp) and motor efficiency is assumed to be 70%.

### Determination of Gas Sparging Electricity Consumption

The procedure for estimating sparging electricity demand followed the same process as described previously.<sup>9</sup> The electricity consumption for gas sparging was determined according to the following equation:

$$P_w = \frac{wRT_1}{29.7ne} \left[ \left( \frac{p_2}{p_1} \right)^{0.283} - 1 \right] \quad \text{(Equation ESI-10)}$$

where  $P_w$  is the power requirement (kW),  $w$  is the weight flow rate of air – volumetric flow rate of air,  $Q_a$ , times specific weight – ( $\text{kg} \cdot \text{s}^{-1}$ ),  $R$  is the engineering gas constant for air ( $8.314 \text{ kJ} \cdot \text{kmol}^{-1} \cdot \text{K}^{-1}$ ),  $T_1$  is the absolute inlet pressure (K),  $p_1$  is the absolute inlet pressure (atm),  $p_2$  is the absolute outlet pressure (atm),  $n$  is 0.283, and  $e$  is the efficiency ( $0.80$ )<sup>10</sup>.

### Determination of Anaerobic Digester Heating Requirements

Digester heating requirements were determined according to the procedure outlined in Tchobanoglous *et al.*, 2013.<sup>11</sup> A side depth of 10 m and a SRT of 20 d was assumed. Waste activated sludge (WAS) was assumed to be thickened to  $25,000 \text{ mg} \cdot \text{L}^{-1}$ . Heat transfer coefficients were obtained from Tchobanoglous *et al.*, 2013<sup>11</sup> and can be found in Table ESI-5 below.

**Table ESI-5.** Heat transfer coefficients (median of range) and temperatures used to calculate digester heating requirements.

|                                                       |       |                                                           |
|-------------------------------------------------------|-------|-----------------------------------------------------------|
| 300 mm thick concrete wall with insulation            | 0.7   | $\text{W} \cdot \text{m}^{-2} \cdot ^\circ\text{C}^{-1}$  |
| 300 mm thick concrete floor in contact with dry earth | 1.7   | $\text{W} \cdot \text{m}^{-2} \cdot ^\circ\text{C}^{-1}$  |
| Floating cover with 25 mm insulating board            | 0.95  | $\text{W} \cdot \text{m}^{-2} \cdot ^\circ\text{C}^{-1}$  |
| Specific heat of sludge                               | 4,200 | $\text{J} \cdot \text{kg}^{-1} \cdot ^\circ\text{C}^{-1}$ |
| Temperature of air                                    | 17    | $^\circ\text{C}$                                          |
| Temperature of incoming sludge                        | 25    | $^\circ\text{C}$                                          |
| Temperature of ground                                 | 10    | $^\circ\text{C}$                                          |
| Temperature of AD                                     | 35    | $^\circ\text{C}$                                          |

Heat loss was calculated according to the following equation:

$$q = UA\Delta T \quad \text{(Equation ESI-11)}$$

where  $q$  is heat loss ( $\text{J} \cdot \text{s}^{-1}$ ),  $U$  is the heat transfer coefficient ( $\text{W} \cdot \text{m}^{-2} \cdot ^\circ\text{C}^{-1}$ ),  $A$  is the cross-sectional area over which heat loss is occurring ( $\text{m}^2$ ), and  $\Delta T$  is the temperature drop across the surface ( $^\circ\text{C}$ ). The required heat is the sum of losses through the walls, floor, and roof of the digester as well as the temperature difference between the digester and the incoming sludge.

## 4. Design Process Overview

---

### General Assumptions

---

Greenfield construction.

Effluent standards are met by all designs.

Granular activated carbon (GAC) is not replaced during the project lifetime.

Including GAC with submerged membrane units eliminates the need for gas sparging (fouling is controlled by fluidizing the bed of GAC around the submerged membranes).

Degassing membranes (DMs) do not need to be replaced during the project lifetime.

DM is 100% effective at removing dissolved methane (i.e., all soluble methane is recovered).

The environmental impacts of grid electricity consumption are based on the US 2014 average mix of fuel sources.

A slope of 1.5:1 and a freeboard of 3 ft were assumed for excavation.

All suspended growth biological trains (AnMBR CSTRs and submerged membrane tanks, CAS, and A/B) had the cross-section of Figure ESI-2.

---

### Design of Anaerobic Membrane Bioreactor (AnMBR) Systems

The sizing of completely stirred tank reactors (CSTRs) was dictated by the specified hydraulic retention time (HRT). For anaerobic filters (AFs) and down-flow aerobic sponge filters (AeFs), reactor volumes were dictated by the specified organic loading rates (OLRs). CSTRs were configured as in Figures ESI-2 to ESI-4, and included a cover. The number of AFs was determined by minimizing the number of equally sized units in parallel with a maximum reactor diameter of 12 meters and a maximum working depth of 6 meters. The cross-sectional area of AeFs was determined by hydraulic loading rate (HLR), after which the number of AeFs was determined by minimizing the number of equally sized units in parallel with a maximum reactor diameter of 12 meters.

For cross-flow membrane configurations, membranes cassettes were assumed to be on racks in a building with the pumps. The total membrane area was dictated by the specified flux and the forward flow. Building area was calculated based on the geometry of representative flat sheet (FS) and multi-tube (MT) membrane cassettes (discussed in Section 4.1.2 of the manuscript).

For submerged membrane configurations, the membrane tank was sized based on the total membrane area (dictated by the specified flux and the forward flow) and the geometry of representative flat sheet (FS) and hollow fiber (HF) membrane cassettes (discussed in Section 4.1.2 of the manuscript). The building housing pumps and blowers (if sparging was used) was constructed at the end of the treatment train.

For CSTRs with submerged membrane modules, the least costs and impacts were achieved when membrane tank volume was minimized. As such, these configurations were designed as a membrane tank preceded by a CSTR. If the necessary HRT for the CSTR was greater than the HRT of the membrane tank, an additional biological reactor (without membranes) was designed to precede the membrane tank. The number of trains was calculated by minimizing the number

of equally sized trains in parallel with 16 to 48 membrane cassettes in a single row (with two parallel rows per train, as shown in Figure ESI-5 and ESI-6).

### **Design of High Rate Activated Sludge + Anaerobic Digester (HRAS+AD) System**

The HRAS+AD design approach followed the general procedure outlined in Rittmann and McCarty<sup>12</sup> with the calculation of required solids residence time (SRT; 1 day) at a specified mixed liquor suspended solids (MLSS) concentration typical of HRAS systems. Hydraulic retention time (HRT) was calculated based on target removal of soluble BOD and kinetics, and HRT was then used to size the biological reactors. Secondary clarifiers and return activated sludge (RAS) pumping were sized based on a maximum solids loading rate (SLR) of 20 lbs·ft<sup>2</sup>·d<sup>-1</sup> and an underflow solids concentration of 10,000 mg-(TSS)·L<sup>-1</sup>. The number of trains in parallel was calculated following the same procedure as AnMBR membrane tanks: the minimum number of equally sized trains in parallel with reactor length between 23 and 30 meters.

Wasted sludge was sent to an anaerobic digester for biogas production and solids stabilization. The design approach followed the general procedure outlined in Tchobanoglous *et al.*, 2013<sup>11</sup> with the specification of SRT (20 days) and operation under mesophilic conditions (35 °C). Methane production was calculated based on 35% BOD degradation and an assumed waste conversion of degraded BOD to methane of 70% (corrected for biomass growth in the digester).<sup>11</sup> Heating requirements for the digester were calculated following Tchobanoglous *et al.*, 2013<sup>11</sup> assuming heat transfer coefficients of 0.7, 2.85, and 0.95 W·m<sup>-2</sup>·°C<sup>-1</sup> for the walls, floor, and floating cover, respectively.<sup>11</sup> Digester heating was achieved first with waste heat from the combined heat and power (CHP) process, with additional heat provided (if required) by burning produced methane solely for heat.

### **Pump, Blower, and Pipe Sizing**

Pumps were sized based on required flows and total dynamic head calculated as the sum of the static head, friction head, and minor losses, and energy consumption was estimated assuming 80% pump efficiency and 70% motor efficiency (56% efficiency overall). Piping for liquids was sized to be the maximum standard pipe diameter that maintained liquid velocity greater than 3 feet·sec<sup>-1</sup> to avoid solids settling.

Gas header and supply manifold piping (for sparging in AnMBR or aeration in CAS and A/B processes) were designed with a target gas velocity of 70 feet·sec<sup>-1</sup>, and a blower efficiency of 70% and motor efficiency of 70% were assumed (49% efficiency overall).

### **Sludge Thickening**

Gravity belt thickeners (GBTs) were designed to operate 24 hours a day, 7 days a week. GBTs were designed such that the maximum hydraulic loading is no more than 150 gal·m<sup>-1</sup>·min<sup>-1</sup> with all units in service. The number of GBTs required was based on a maximum GBT width of 3 meters per GBT.

### **Degassing Membrane**

Degassing membranes (DMs) were designed to remove biogas from membrane permeate at a rate of 30 m<sup>3</sup>·hr<sup>-1</sup> per unit with all units in service.<sup>5</sup> The number of required units was calculated based on the permeate flow rate. The DMs were assumed to be 100% efficient and consumed 3 kW·DM<sup>-1</sup>. If a DM was not utilized in a design, between 30-50% of the biogas remained dissolved in the effluent and was emitted to the atmosphere.

**Table ESI-6.** Values used to generate Figure 6 and corresponding citations. “Citation” information includes a letter in parentheses (corresponding to the letter in Figure 6) and its corresponding reference (superscript number) in the ESI References section. A “-” denotes values not reported in a given article.

| Citation          | Configuration                           | SGD<br>[m <sup>3</sup> ·m <sup>-2</sup> ·h <sup>-1</sup> ] | CFV<br>[m·s <sup>-1</sup> ] | HRT<br>[h] | OLR<br>[g COD·L <sup>-1</sup> ·d <sup>-1</sup> ] | TMP<br>[bar] | Flux<br>[LMH] | COD Removal<br>[%] |
|-------------------|-----------------------------------------|------------------------------------------------------------|-----------------------------|------------|--------------------------------------------------|--------------|---------------|--------------------|
| (a) <sup>14</sup> | Submerged, GAC, Hollow Fiber            | -                                                          | -                           | 2.2-3.3    | 1.6-2.2                                          | 0.20         | 6-9           | 93-96              |
| (b) <sup>15</sup> | Submerged, Flat Sheet                   | -                                                          | -                           | 15-40      | -                                                | -            | 3.5           | 96.7               |
| (c) <sup>16</sup> | Submerged, Hollow Fiber                 | -                                                          | -                           | 3.5-5.7    | 1.6-4.5                                          | -            | -             | 85-96              |
| (d) <sup>17</sup> | Cross-flow, Hollow Fiber                | 0.15                                                       | 4.70E-05                    | 8.5        | -                                                | 0.015-0.063  | 17            | 94±2.0             |
| (e) <sup>18</sup> | Submerged, Hollow Fiber                 | 0.23                                                       | -                           | 6-20       | -                                                | 0-1          | 10-20         | 87±3.4             |
| (f) <sup>19</sup> | Submerged                               | 8-16                                                       | -                           | 13-14      | 1.6-2.0                                          | 0.4-0.55     | -             | 90                 |
| (g) <sup>20</sup> | -                                       | 40-60                                                      | -                           | -          | -                                                | -            | -             | -                  |
| (h) <sup>21</sup> | Cross-flow, Flat Sheet                  | 4.8                                                        | 0.083                       | -          | -                                                | -            | -             | 95                 |
| (i) <sup>22</sup> | Cross-flow                              | -                                                          | 0.1-0.2                     | 18         | -                                                | 0.035-0.21   | 4-12          | 94-97              |
| (j) <sup>23</sup> | Submerged, GAC                          | -                                                          | -                           | 3-24       | -                                                | -            | 10-20         | 91-95              |
| (k) <sup>24</sup> | Submerged                               | -                                                          | -                           | 8-12       | 1.1                                              | 0.30         | -             | 97                 |
| (l) <sup>25</sup> | Submerged, GAC, Hollow Fiber            | -                                                          | -                           | 2.2-3.1    | 6.2                                              | -            | 7-10          | 99±1               |
| (m) <sup>26</sup> | Cross-flow, Multi-tube and Hollow Fiber | -                                                          | 0.4-2                       | 16         | -                                                | -            | 4-41          | 90-95              |
| (n) <sup>27</sup> | Cross-flow, Flat Sheet                  | 62                                                         | 0.026                       | 19         | 0.5-1.1                                          | 0.177        | 7             | 90                 |
| (o) <sup>11</sup> | -                                       | -                                                          | -                           | -          | 5-15                                             | -            | -             | -                  |
| (p) <sup>28</sup> | Cross-flow                              | -                                                          | 1                           | 6          | 2                                                | -            | 12.3          | 90                 |
| (q) <sup>29</sup> | Cross-flow                              | -                                                          | 1                           | 6          | 2                                                | -            | 12.3          | 92                 |
| (r) <sup>30</sup> | Submerged, Hollow Fiber                 | 0.23                                                       | -                           | 6-26       | 1.1                                              | -            | 9-13.3        | -                  |
| (s) <sup>31</sup> | Submerged, PAC                          | 3                                                          | -                           | 8          | 2                                                | 0.28-0.46    | 5-8           | 99                 |
| (t) <sup>32</sup> | Cross-flow                              | -                                                          | 0.1-0.3                     | 6-12       | 0.8-10                                           | -            | 6             | 95-98              |

## 5. Representative Schematics of Designed Treatment Systems

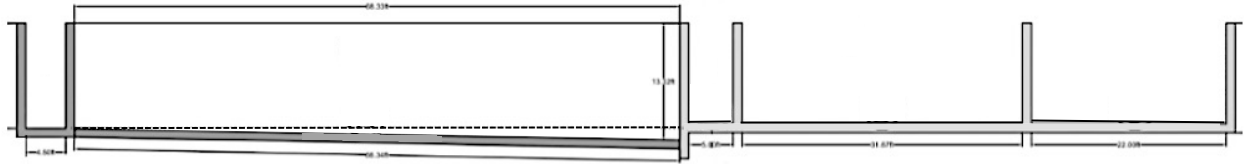

**Figure ESI-2.** Side view of membrane tank and pumphouse for submerged AnMBRs. Flow proceeds from left to right with the influent distribution channel, membrane tanks in parallel, and the effluent channel with a building for permeate pumps and blowers (if gas sparging is needed).

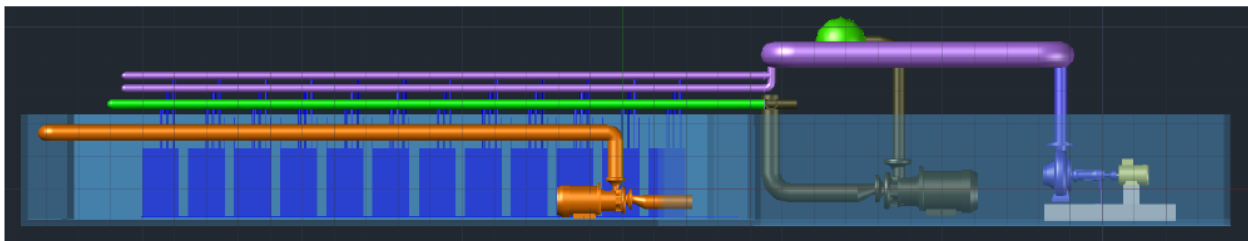

**Figure ESI-3.** Detailed side view of membrane tank and pumphouse for submerged AnMBRs. All relevant materials are included: reinforced concrete (hatched blue), membrane cassettes (royal blue), permeate piping (green), gas headers (purple), permeate pumps (black), internal recirculation pump and piping (orange), and blowers for sparging (purple and yellow).

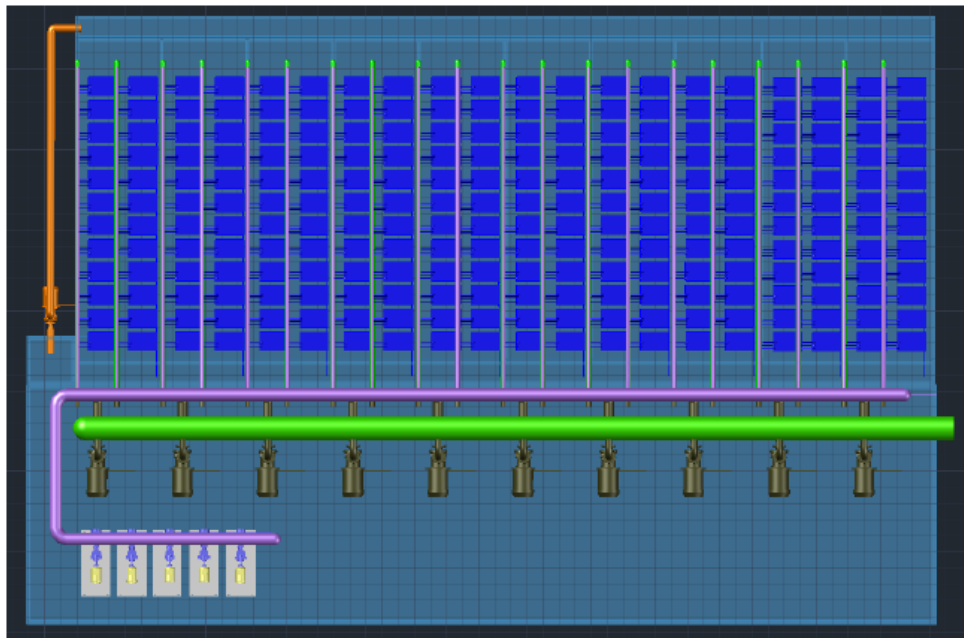

**Figure ESI-4.** Detailed plan view of membrane tank and pumphouse for submerged AnMBR configuration. All relevant materials are included: reinforced concrete (hatched blue), membrane cassettes (royal blue), permeate piping (green), gas headers (purple), permeate pumps (black), internal recirculation pump and piping (orange), and blowers for sparging (purple and yellow).

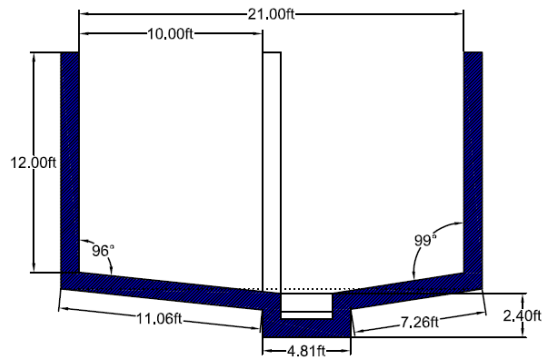

**Figure ESI-5.** Side view of a single membrane train.

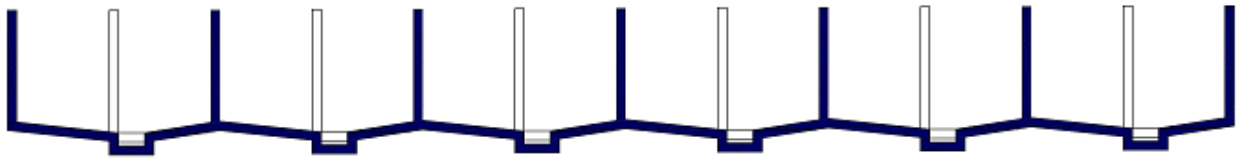

**Figure ESI-6.** Side view of membrane trains in series.



## 6. References

1. Harris, R. W., Cullinane, Jr., M. J. & Sun, P. T. Process design and cost estimating algorithms for the computer assisted procedure for design and evaluation of wastewater treatment systems (CAPDET). (U. S. Army Engineer Waterways Experiment Station, 1982).
2. Hydromantis. CapdetWorks. (Hydromantis, 2014).
3. U.S. Energy Information Administration. Electricity Monthly Update - End Use: September 2015. (U.S. Department of Energy, 2015).
4. Medordi, C. EF-120. (2014).
5. DIC Corporation. Specification Sheet of SEPAREL EF-120. (2010).
6. Hazen and Sawyer. UIUC Conference Call Follow-Up Questions. (2014).
7. USEPA, RDC, ERG & CHPP. Opportunities for combined heat and power at wastewater treatment facilities: Market analysis and lessons from the field. (2011).
8. Pretel, R., Robles, A., Ruano, M. V., Seco, A. & Ferrer, J. Environmental impact of submerged anaerobic MBR (SAnMBR) technology used to treat urban wastewater at different temperatures. *Bioresour. Technol.* **149**, 532–540 (2013).
9. Shoener, B. D., Bradley, I. M., Cusick, R. D. & Guest, J. S. Energy positive domestic wastewater treatment: The roles of anaerobic and phototrophic technologies. *Environ. Sci. Process. Impacts* **16**, 1204–1222 (2014).
10. Tchobanoglous, G., Burton, F. L. & Stensel, H. D. Wastewater engineering: Treatment and reuse. (McGraw-Hill Professional, 2003).
11. Tchobanoglous, G., Stensel, H. D., Tsuchihashi, R. & Burton, F. L. Wastewater engineering: Treatment and resource recovery. (McGraw-Hill Higher Education, 2013).
12. Rittmann, B. E. & McCarty, P. L. Environmental biotechnology: Principles and applications. (McGraw-Hill, 2001).
13. Wett, B., Buchauer, K. & Fimml, C. Energy self-sufficiency as a feasible concept for wastewater treatment systems. in 21–24 (2007).
14. Bae, J., Shin, C., Lee, E., Kim, J. & McCarty, P. L. Anaerobic treatment of low-strength wastewater: A comparison between single and staged anaerobic fluidized bed membrane bioreactors. *Bioresour. Technol.* **165**, 75–80 (2014).
15. Chen, L. et al. Performance of a submerged anaerobic membrane bioreactor with forward osmosis membrane for low-strength wastewater treatment. *Water Res.* **50**, 114–123 (2014).
16. Chu, L.-B., Yang, F.-L. & Zhang, X.-W. Anaerobic treatment of domestic wastewater in a membrane-coupled expanded granular sludge bed (EGSB) reactor under moderate to low temperature. *Process Biochem.* **40**, 1063–1070 (2005).
17. Dong, Q., Parker, W. & Dagnew, M. Impact of FeCl<sub>3</sub> dosing on AnMBR treatment of municipal wastewater. *Water Res.* **80**, 281–293 (2015).
18. Giménez, J. B. et al. Experimental study of the anaerobic urban wastewater treatment in a submerged hollow-fibre membrane bioreactor at pilot scale. *Bioresour. Technol.* **102**, 8799–8806 (2011).
19. Gouveia, J., Plaza, F., Garralon, G., Fdz-Polanco, F. & Peña, M. Long-term operation of a pilot scale anaerobic membrane bioreactor (AnMBR) for the treatment of municipal wastewater under psychrophilic conditions. *Bioresour. Technol.* **185**, 225–233 (2015).
20. Grady Jr, C. P. L., Daigger, G. T., Love, N. G. & Filipe, C. D. M. Biological Wastewater Treatment, Third Edition. (CRC Press, 2012).
21. Gu, Y. et al. Development of anaerobic osmotic membrane bioreactor for low-strength wastewater treatment at mesophilic condition. *J. Membr. Sci.* **490**, 197–208 (2015).
22. Ho, J. H., Khanal, S. K. & Sung, S. Anaerobic membrane bioreactor for treatment of synthetic municipal wastewater at ambient temperature. *Water Sci. Technol.* **55**, 79 (2007).

23. Hu, A. & Stuckey, D. Activated carbon addition to a submerged anaerobic membrane bioreactor: Effect on performance, transmembrane pressure, and flux. *J. Environ. Eng.* **133**, 73–80 (2007).
24. Huang, Z., Ong, S. L. & Ng, H. Y. Submerged anaerobic membrane bioreactor for low-strength wastewater treatment: Effect of HRT and SRT on treatment performance and membrane fouling. *Water Res.* **45**, 705–713 (2011).
25. Kim, J. et al. Anaerobic fluidized bed membrane bioreactor for wastewater treatment. *Environ. Sci. Technol.* **45**, 576–581 (2011).
26. Martin-Garcia, I. et al. Impact of membrane configuration on fouling in anaerobic membrane bioreactors. *J. Membr. Sci.* **382**, 41–49 (2011).
27. Martinez-Sosa, D. et al. Anaerobic submerged membrane bioreactor (AnSMBR) for municipal wastewater treatment under mesophilic and psychrophilic temperature conditions. *Bioresour. Technol.* **102**, 10377–10385 (2011).
28. Ozgun, H. et al. Impact of temperature on feed-flow characteristics and filtration performance of an upflow anaerobic sludge blanket coupled ultrafiltration membrane treating municipal wastewater. *Water Res.* **83**, 71–83 (2015).
29. Ozgun, H. et al. Impact of membrane addition for effluent extraction on the performance and sludge characteristics of upflow anaerobic sludge blanket reactors treating municipal wastewater. *J. Membr. Sci.* **479**, 95–104 (2015).
30. Robles, A., Ruano, M. V., García-Usach, F. & Ferrer, J. Sub-critical filtration conditions of commercial hollow-fibre membranes in a submerged anaerobic MBR (HF-SAnMBR) system: The effect of gas sparging intensity. *Bioresour. Technol.* **114**, 247–254 (2012).
31. Vyrides, I. & Stuckey, D. C. Saline sewage treatment using a submerged anaerobic membrane reactor (SAMBR): Effects of activated carbon addition and biogas-sparging time. *Water Res.* **43**, 933–942 (2009).
32. Wei, C.-H., Harb, M., Amy, G., Hong, P.-Y. & Leiknes, T. Sustainable organic loading rate and energy recovery potential of mesophilic anaerobic membrane bioreactor for municipal wastewater treatment. *Bioresour. Technol.* **166**, 326–334 (2014).
